# Supplementary material
Source: Springer Nature journal article supplement (https://www.springermedizin.de/resource/supplementary/12885_2012_3760_MOESM2_ESM.pdf/9464338)

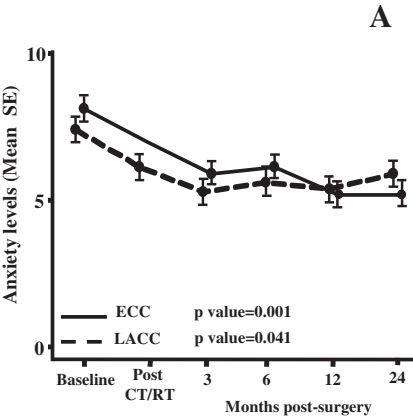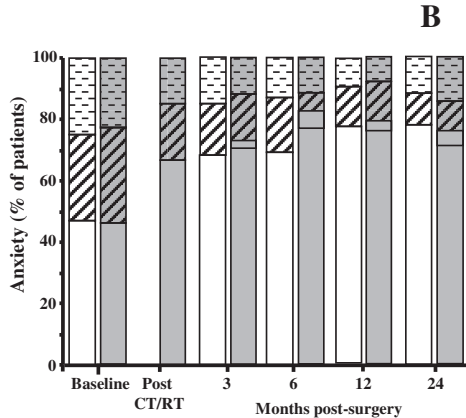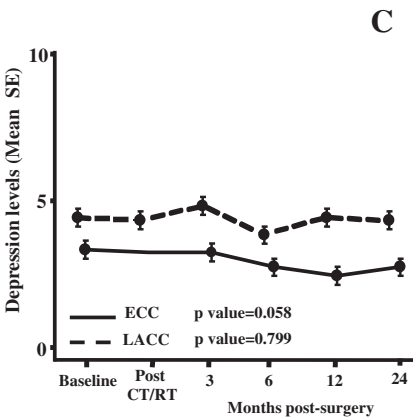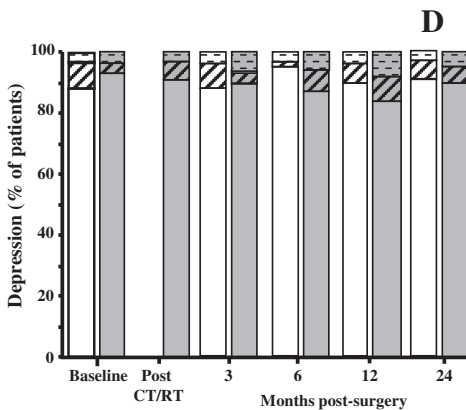

**HADS score**

≥11
 8-10
 ≤7

Supplement: MOESM2 [file 9464338]
